# Supplementary material for: Lipofuscin-like autofluorescence within microglia and its impact on studying microglial engulfment
Source: PubMed Central journal article supplement (PMC10002639; doi:10.1101/2023.02.28.530224), 2023-03-01
Supplement: media-1.pdf [file media-1.pdf]

**a**

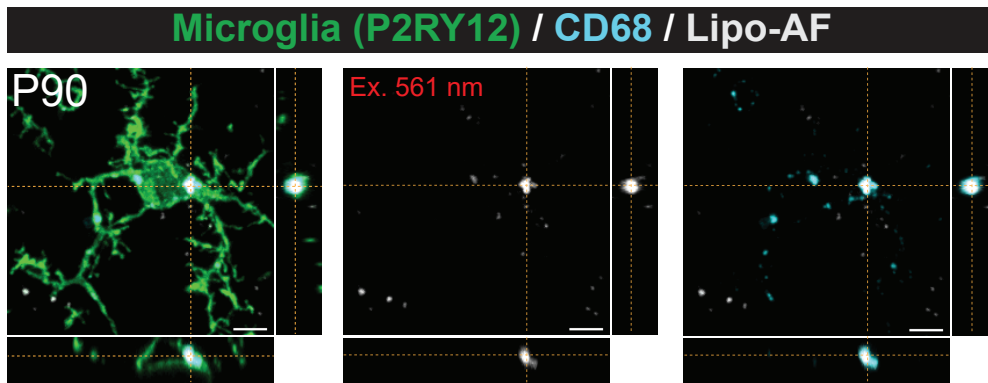

**b**

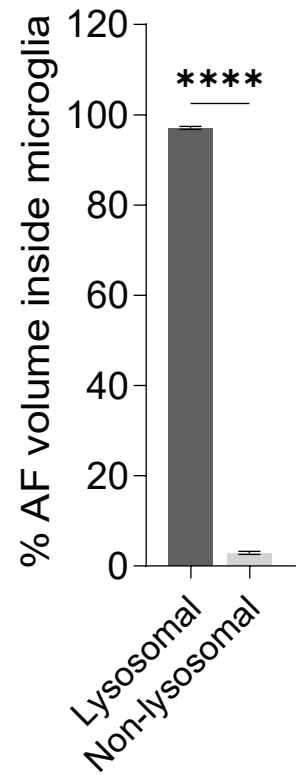

**Supplementary Figure 1. Microglial lipo-AF is enriched in CD68+ lysosomes.** **a** Representative orthogonal view of an anti-P2RY12 immunolabelled microglia (green) in the P90 mouse cortex containing lipofuscin-like autofluorescence (lipo-AF, white) within anti-CD68+ lysosomal compartments (cyan). Scale bars = 5  $\mu$ m. **b** Quantification of the percentage of lysosomal (dark gray bar) and non-lysosomal (light gray bar) lipo-AF inside microglia. Data are represented as mean  $\pm$  SEM, n = 3 mice. Two-tailed unpaired t-test ( $t = 198.5$ ,  $df = 4$ ); \*\*\*\* $p < 0.0001$ .
